# Supplementary material for: Solvent-Free Synthesis, In Vitro and In Silico Studies of Novel Potential 1,3,4-Thiadiazole-Based Molecules against Microbial Pathogens
Source: MDPI journal article supplement (doi:10.3390/molecules27020342), 2022-01-06
Supplement: s1 [file s1]

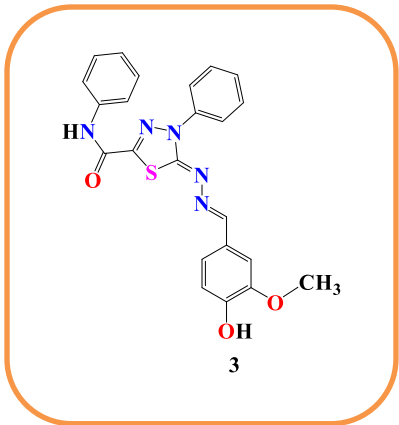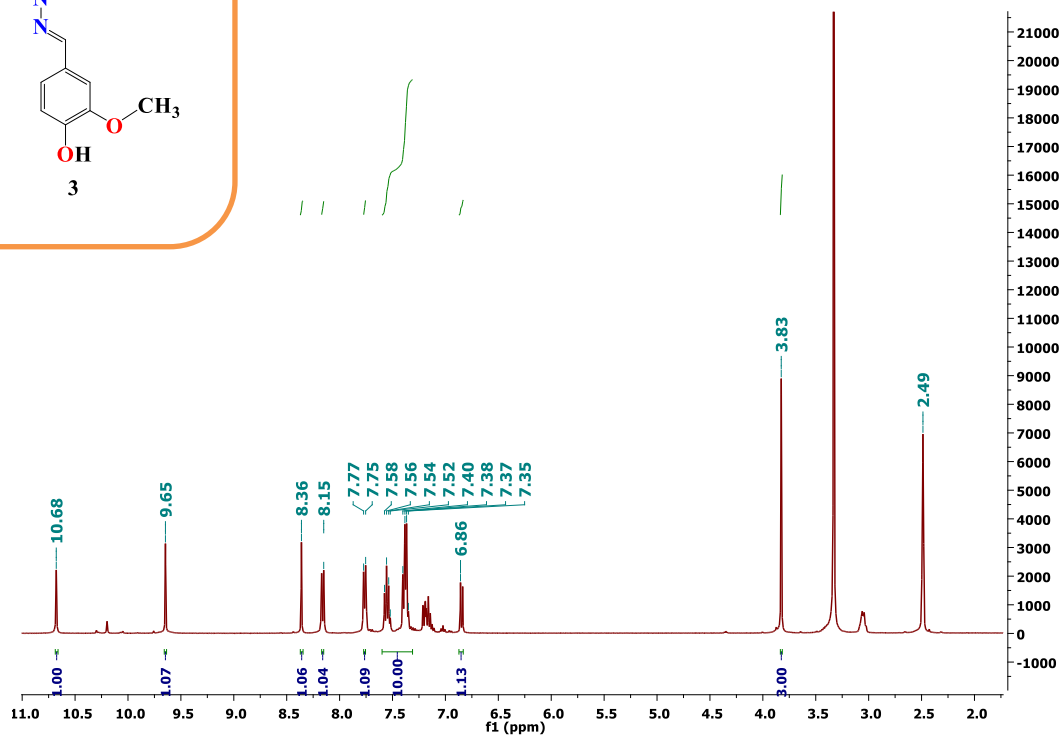

Figure S1: <sup>1</sup>H NMR spectrum of comp. 3.

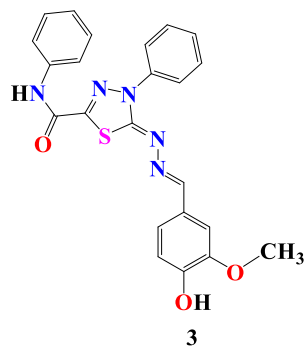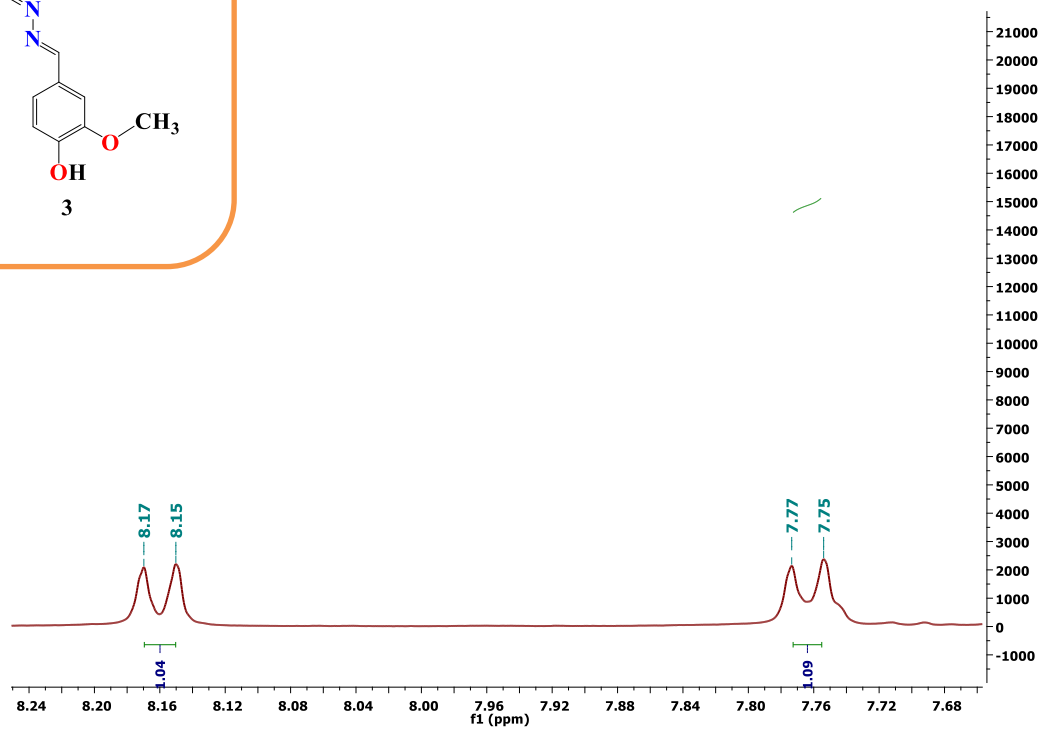

**Figure S2:** Magnification of  $^1\text{H}$  NMR spectrum of comp. 3.

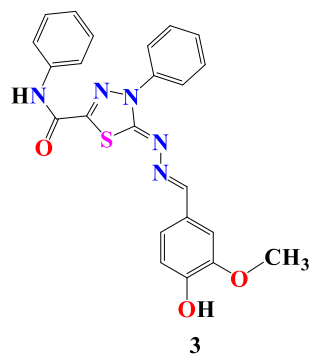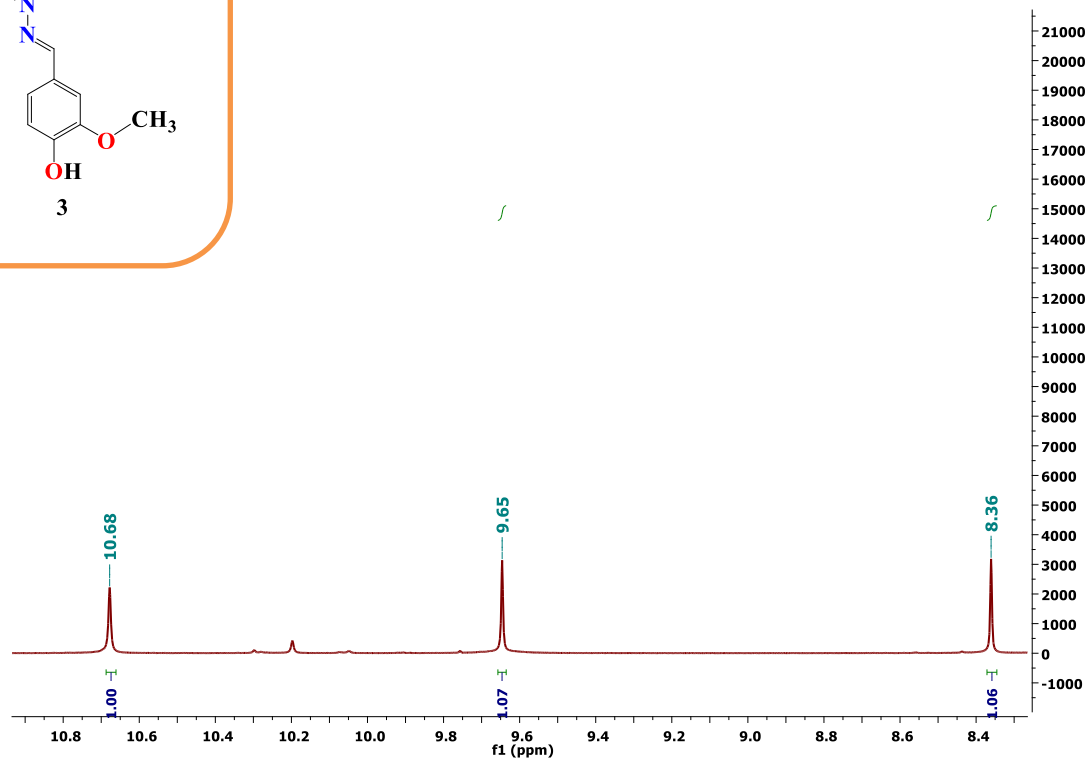

**Figure S3:** Magnification of  $^1\text{H}$ NMR spectrum of comp. **3**.

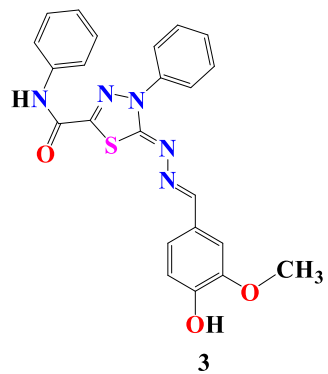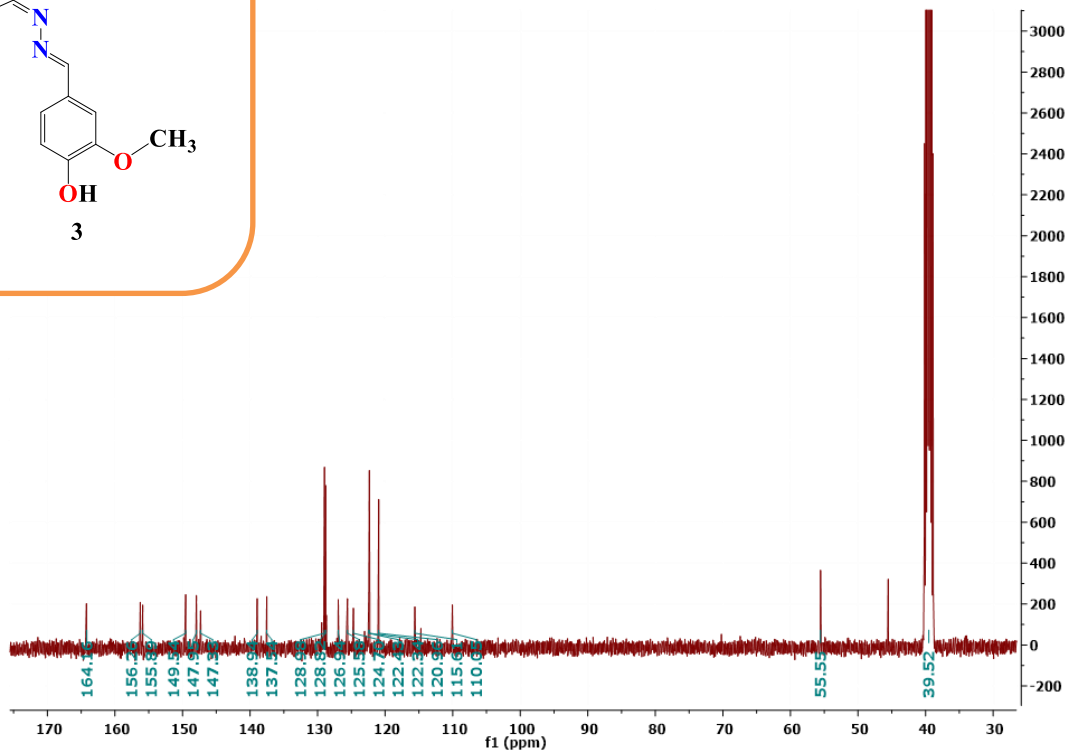

Figure S4: <sup>13</sup>C NMR spectrum of comp. 3.

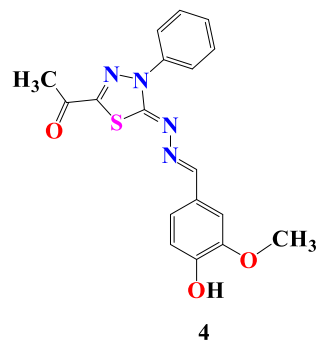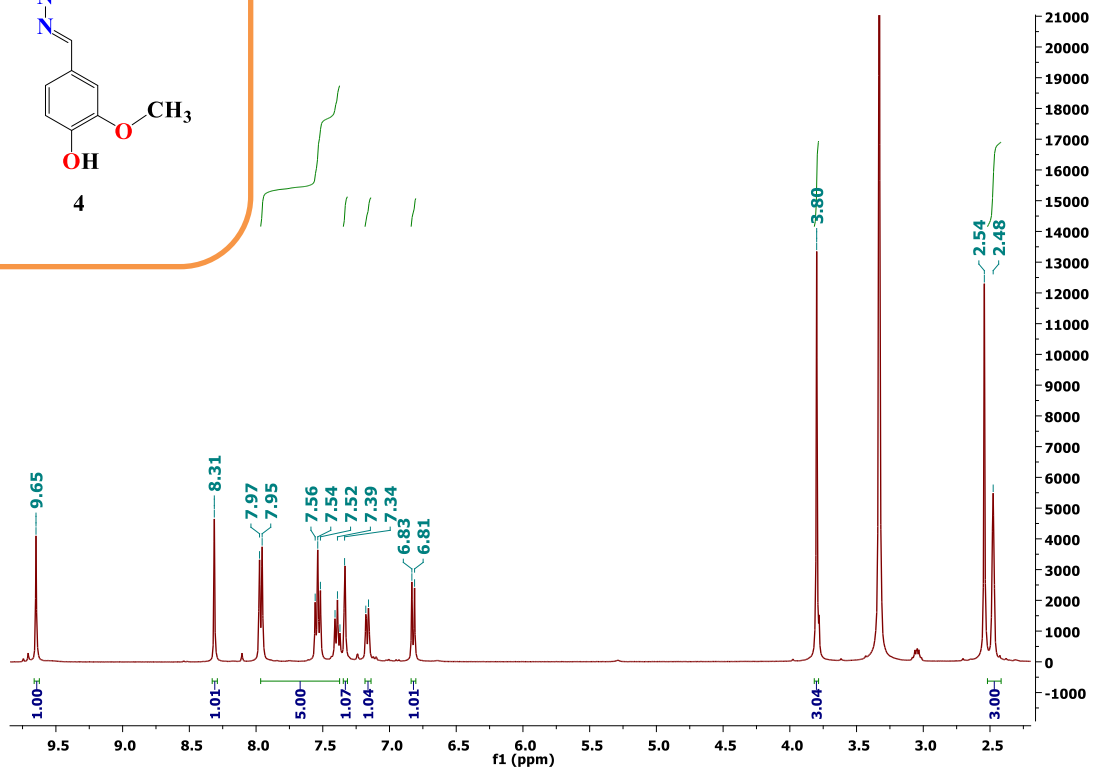

Figure S5: <sup>1</sup>H NMR spectrum of comp. 4.

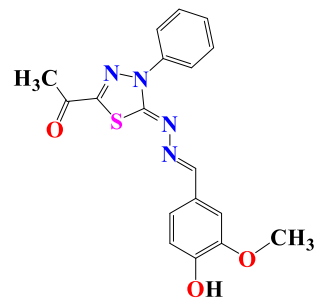

4

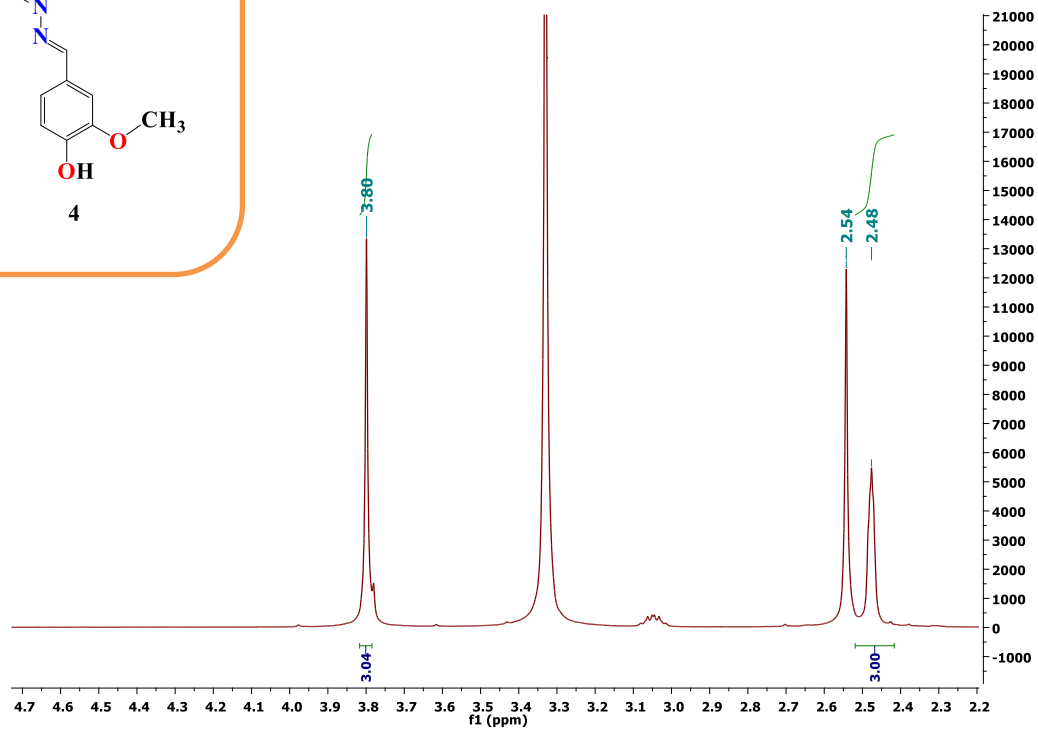

**Figure S6:** Magnification of  $^1\text{H}$ NMR spectrum of comp. 4.

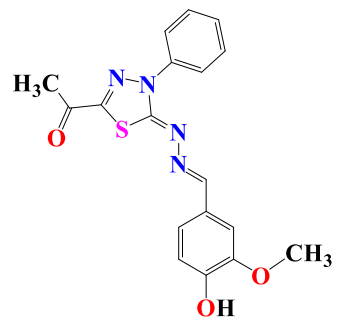

4

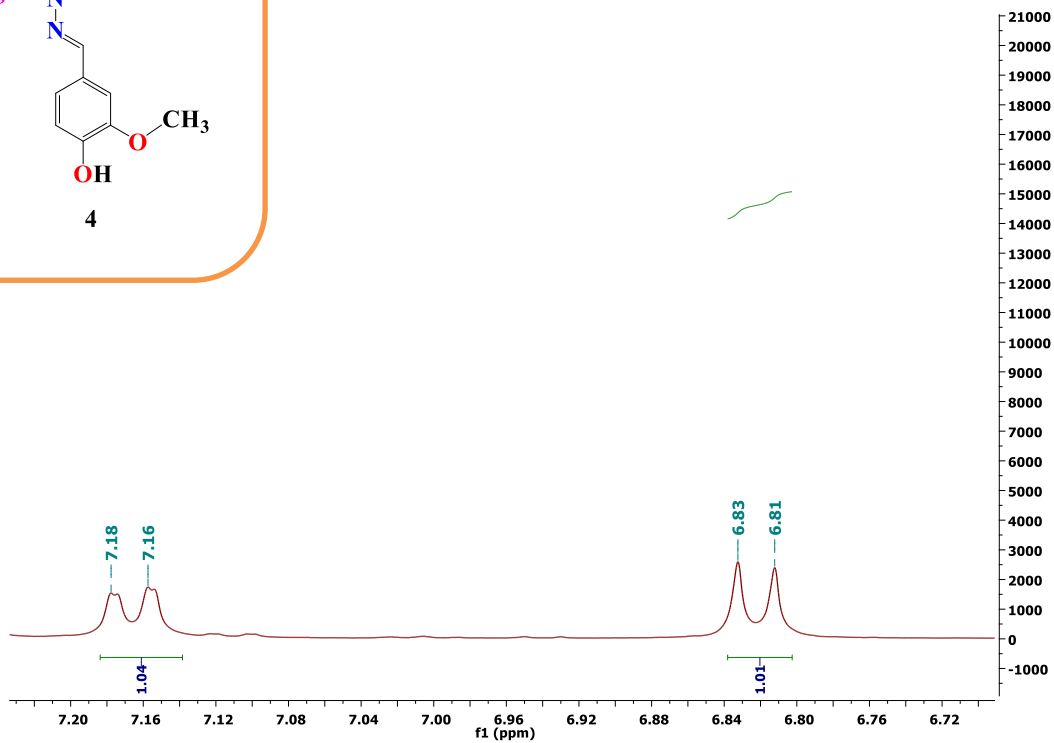

**Figure S7:** Magnification of  $^1\text{H}$ NMR spectrum of comp. 4.

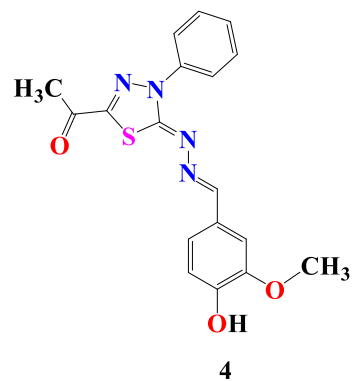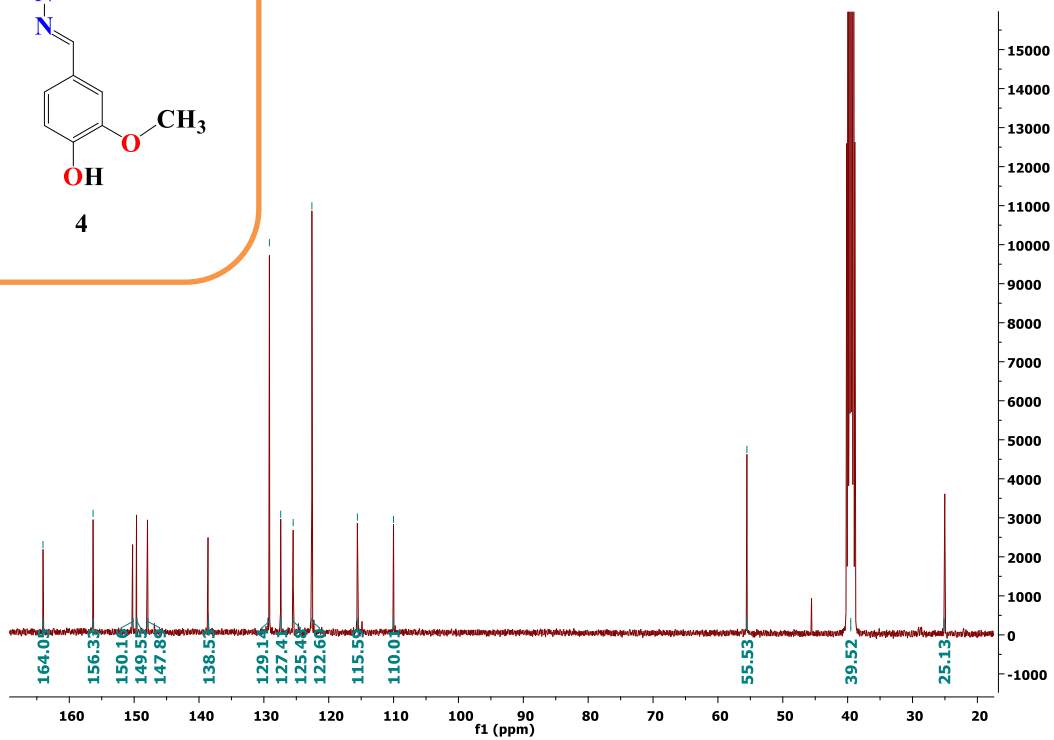

Figure S8: C13NMR spectrum of comp. 4.



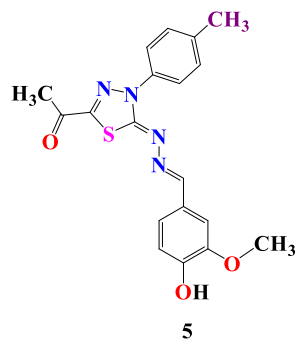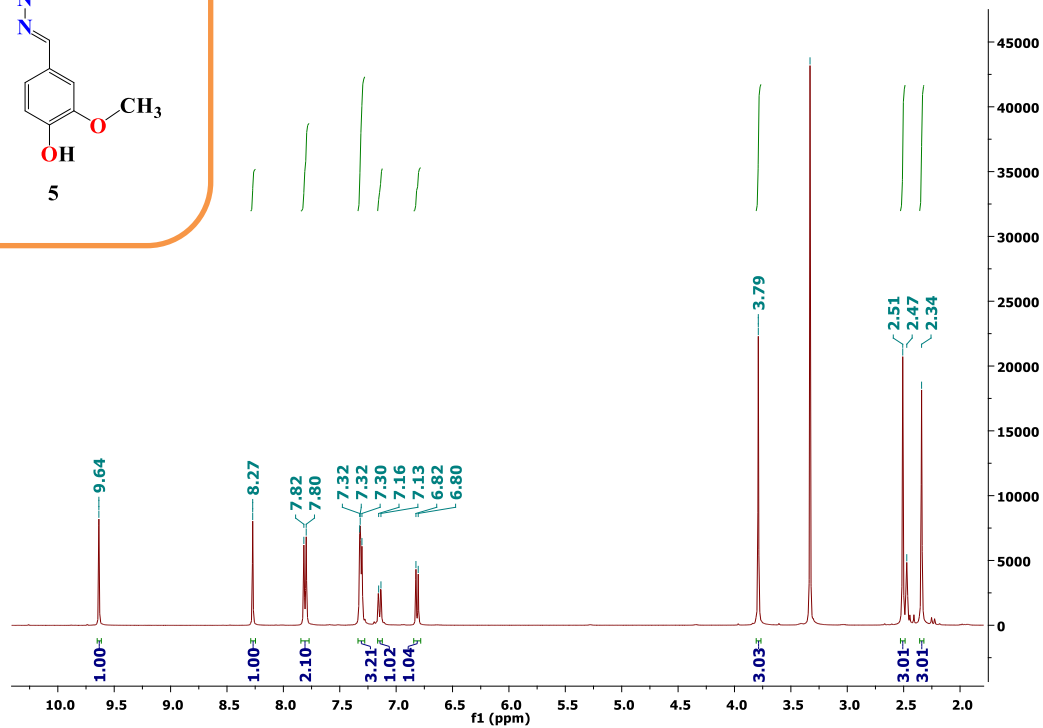

Figure S9: <sup>1</sup>H NMR spectrum of comp. 5.

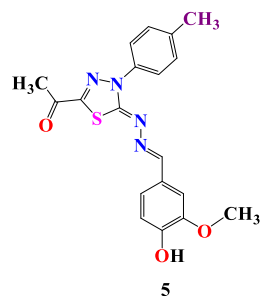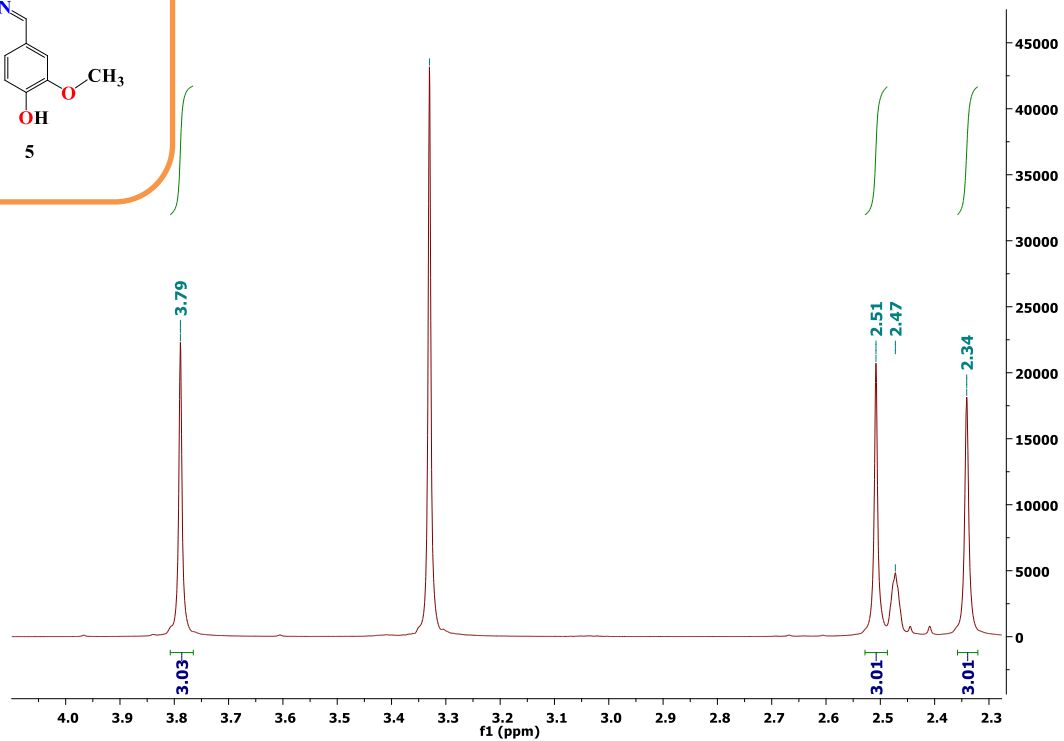

**Figure S10:** Magnification of <sup>1</sup>H NMR spectrum of comp. 5.

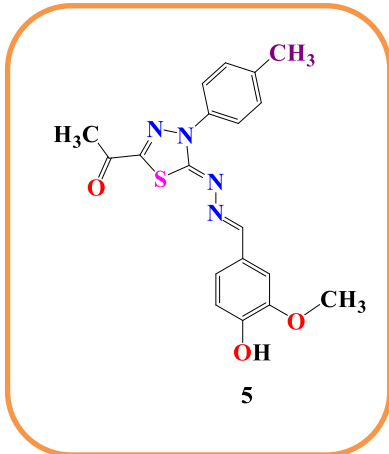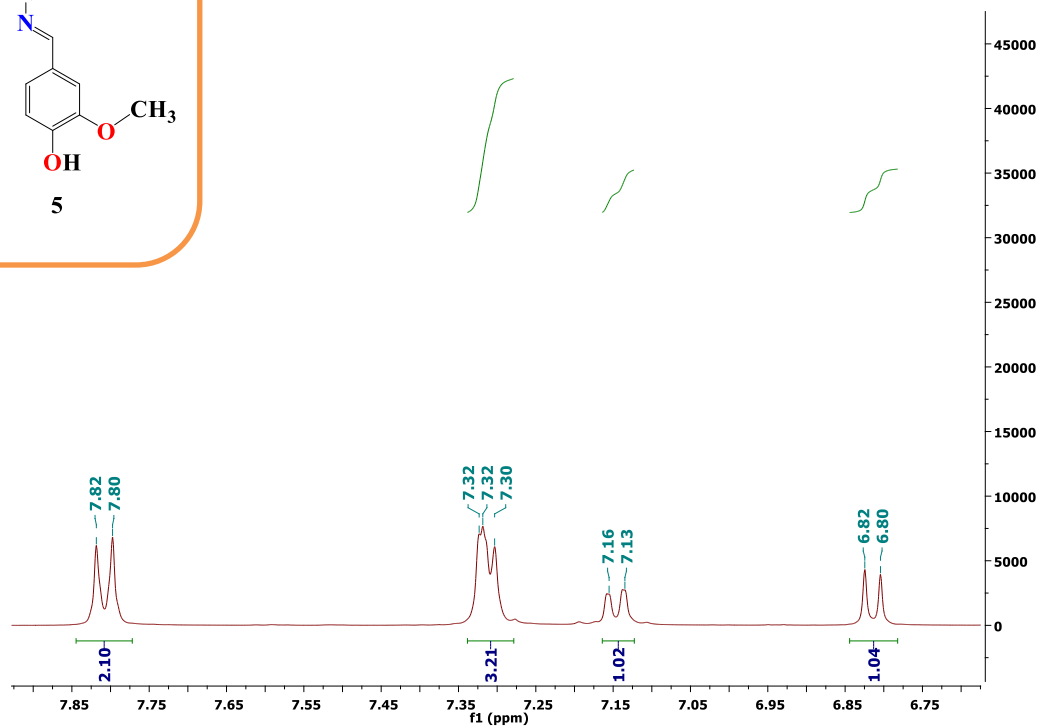

**Figure S11:** Magnification of  $^1\text{H}$ NMR spectrum of comp. 5.

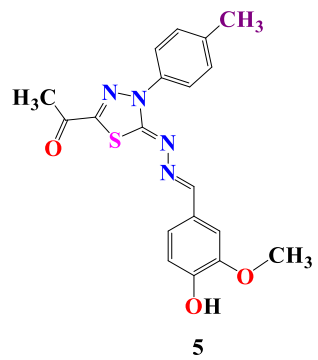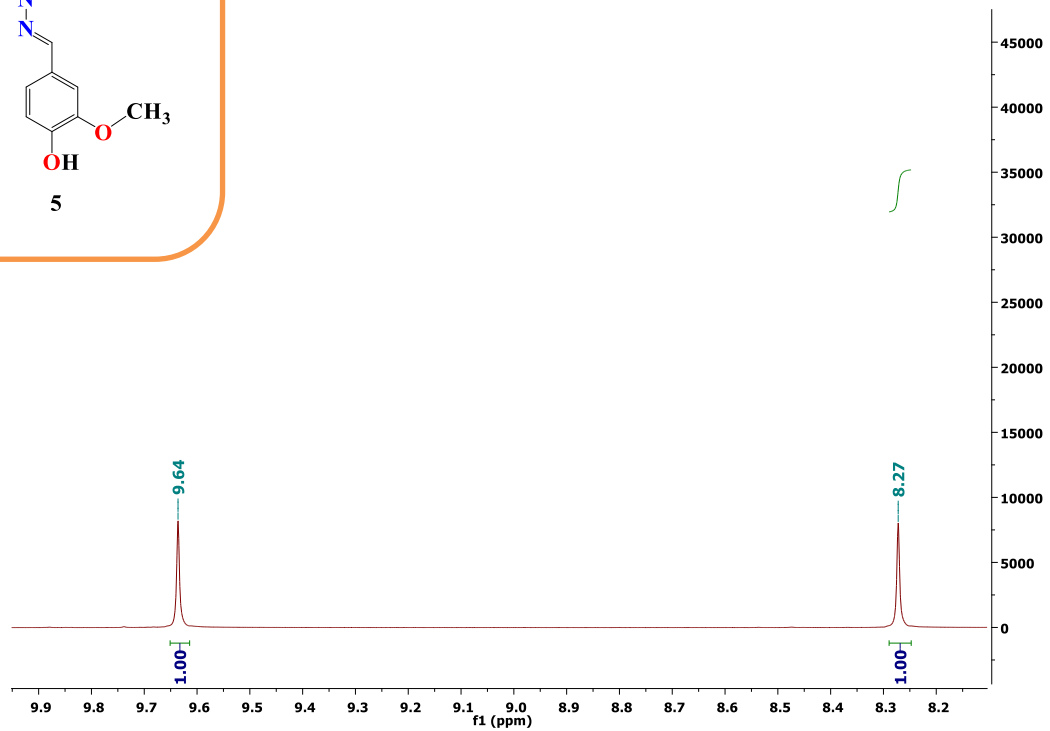

**Figure S12:** Magnification of H<sup>1</sup>NMR spectrum of comp. 5.

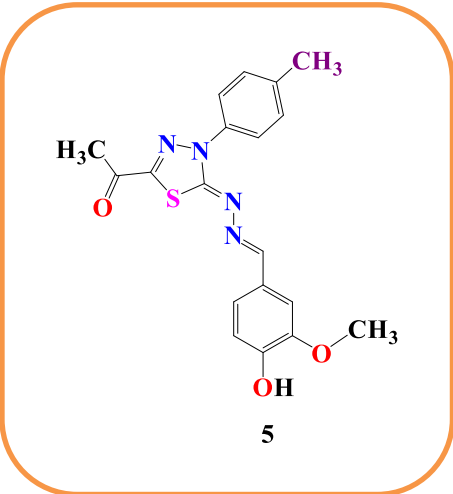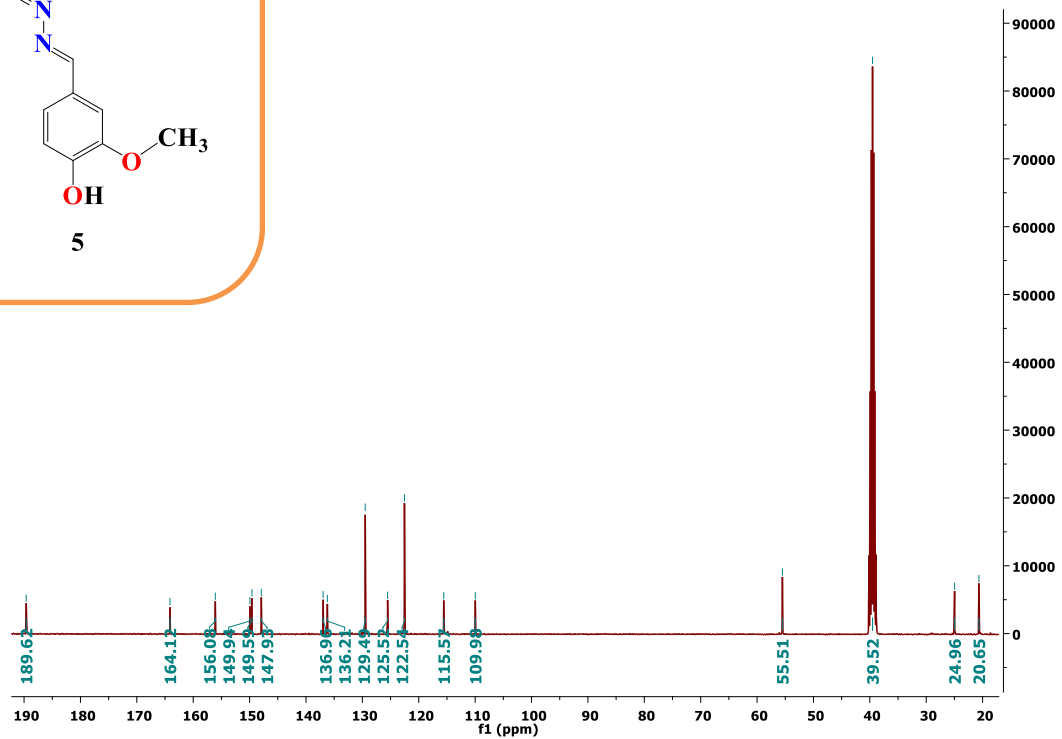

**Figure S13:** C13NMR spectrum of comp. 5.

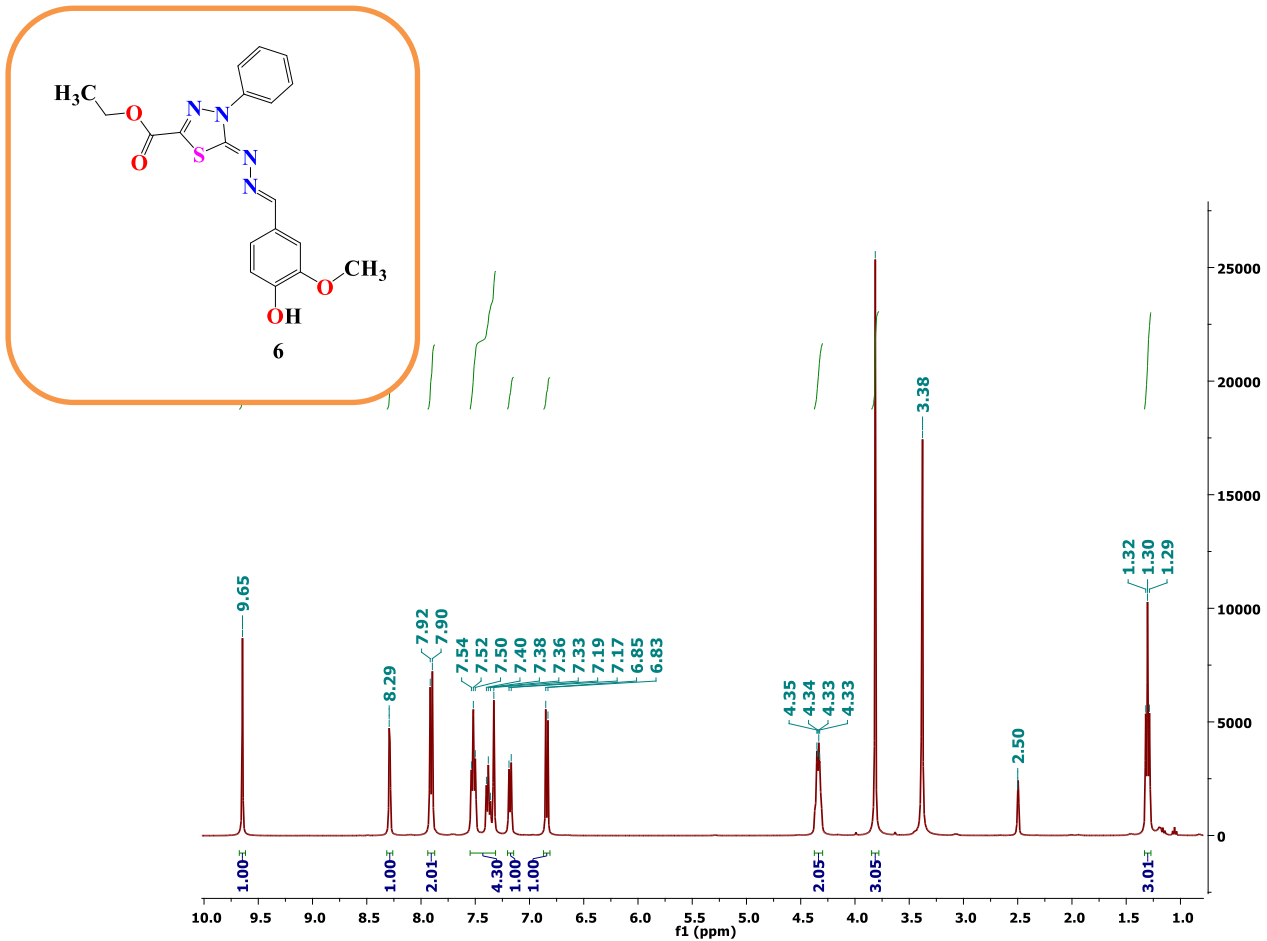

Figure S14: <sup>1</sup>H NMR spectrum of comp. 6.

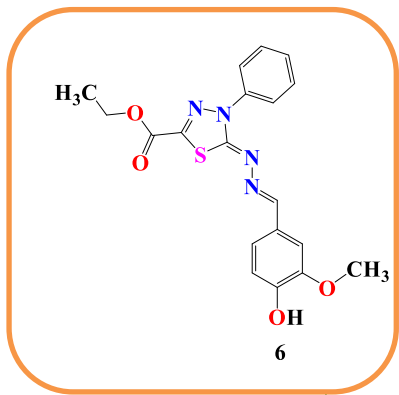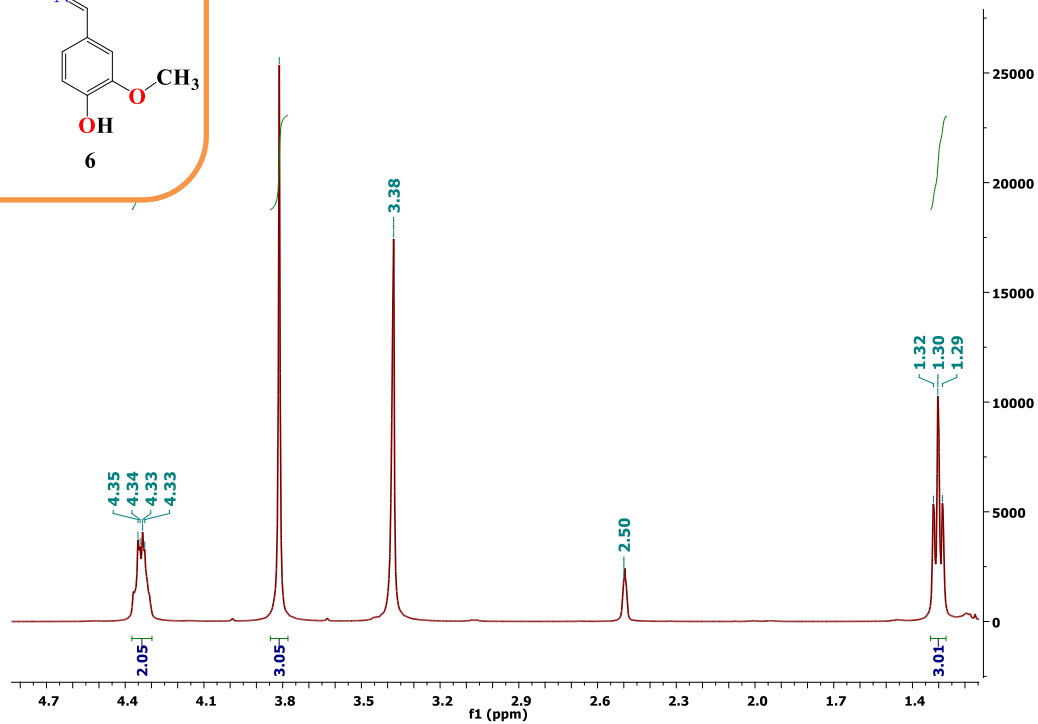

**Figure S15:** Magnification of <sup>1</sup>H NMR spectrum of comp. **6**.

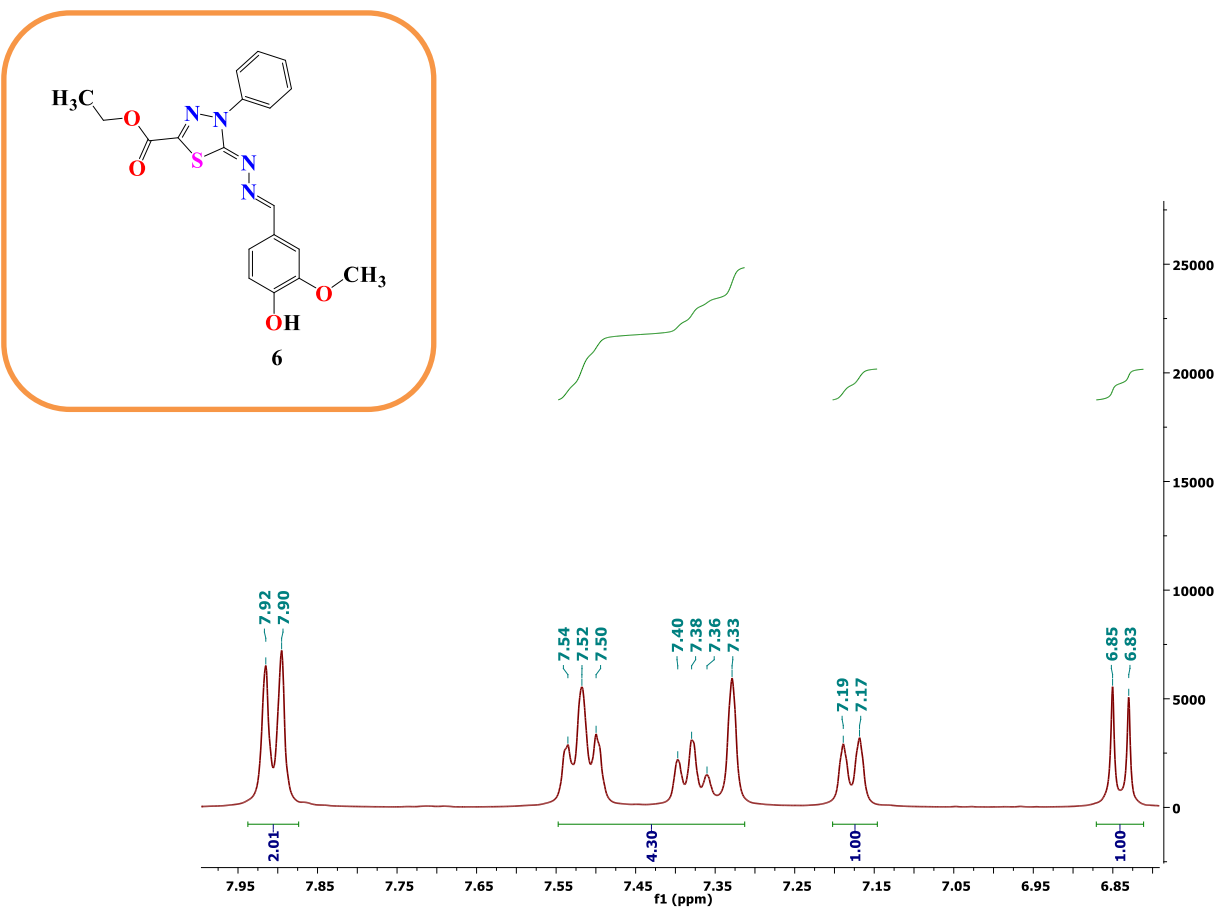

**Figure S16:** Magnification of <sup>1</sup>H NMR spectrum of comp. **6**.



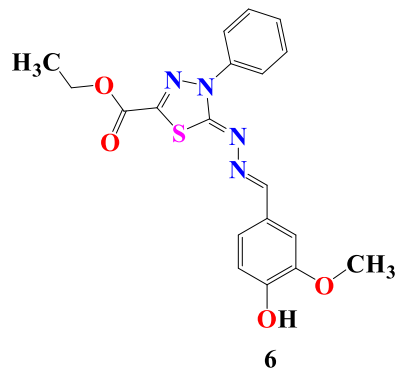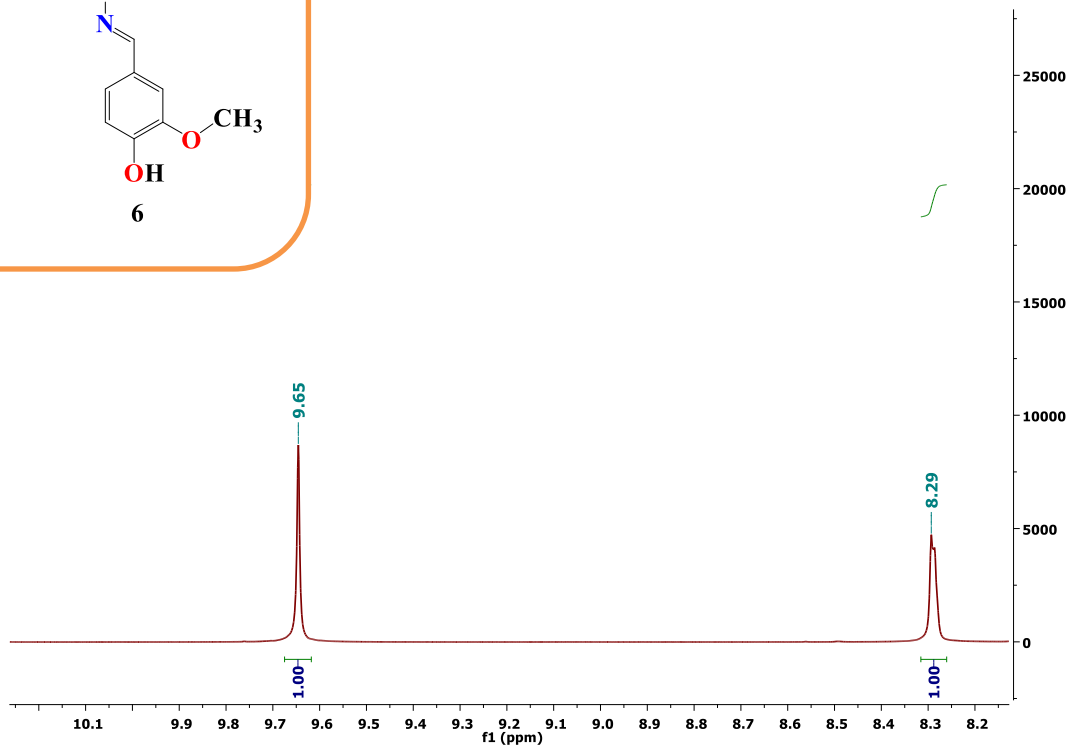

**Figure S17:** Magnification of <sup>1</sup>H NMR spectrum of comp. **6**.

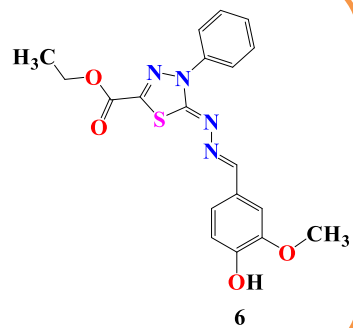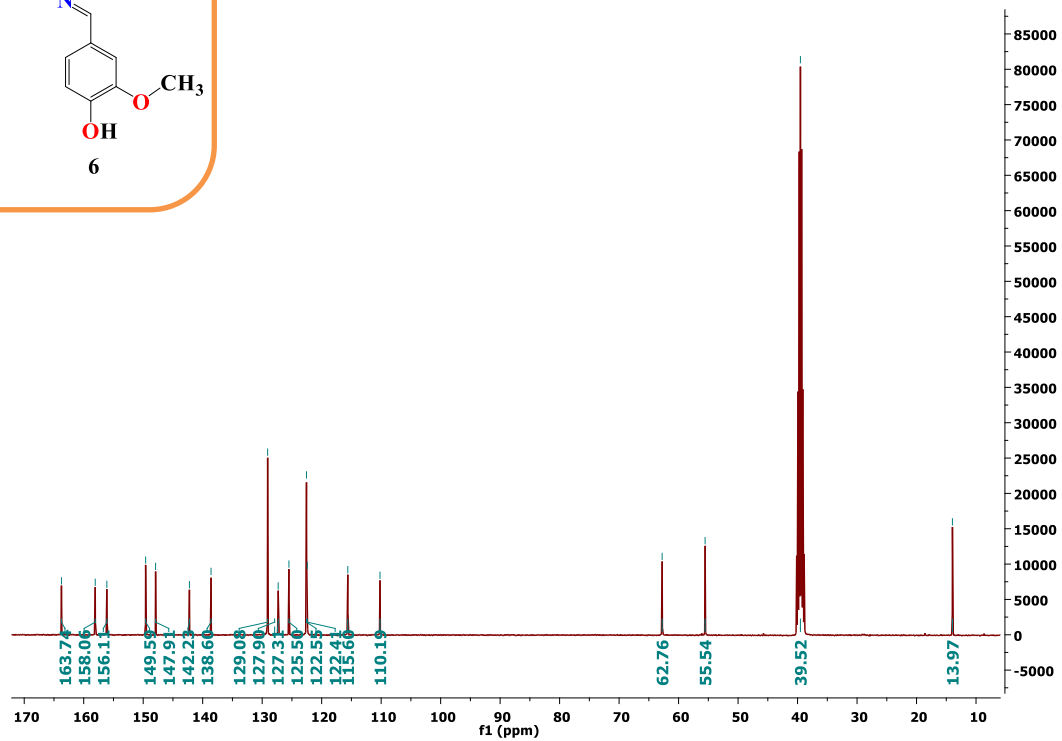

Figure S18:  $^{13}\text{C}$ NMR spectrum of comp. 6.

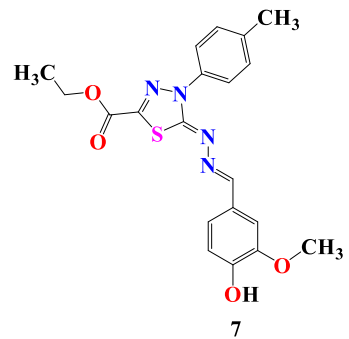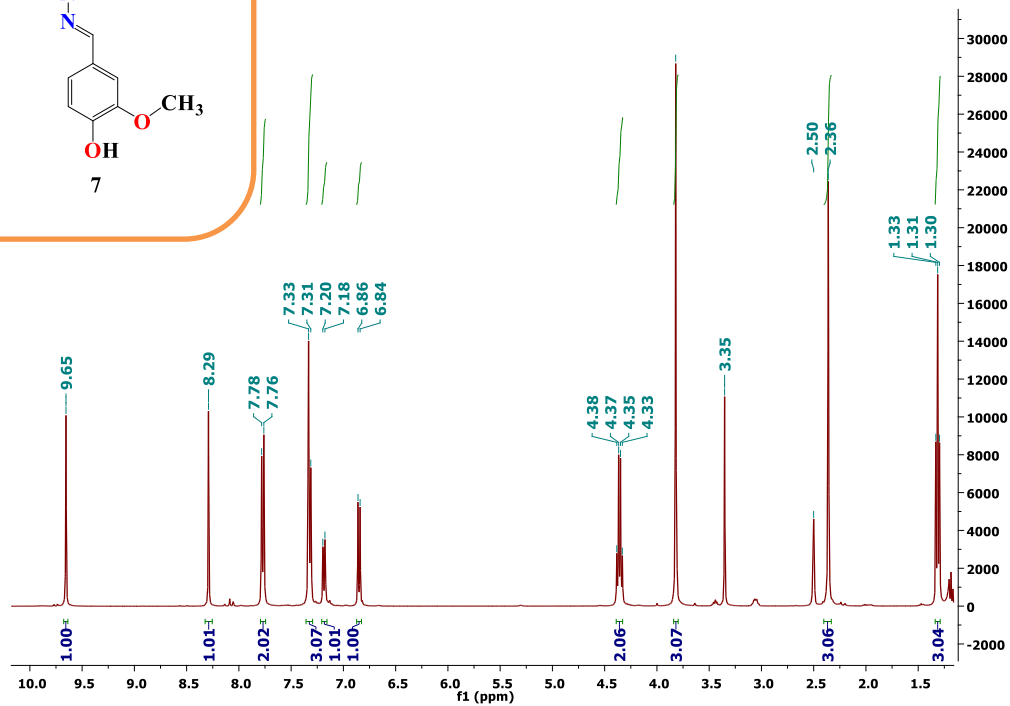

Figure S19: <sup>1</sup>H NMR spectrum of comp. 7.

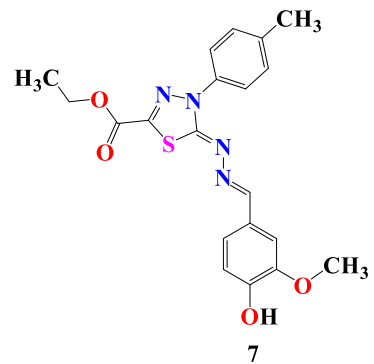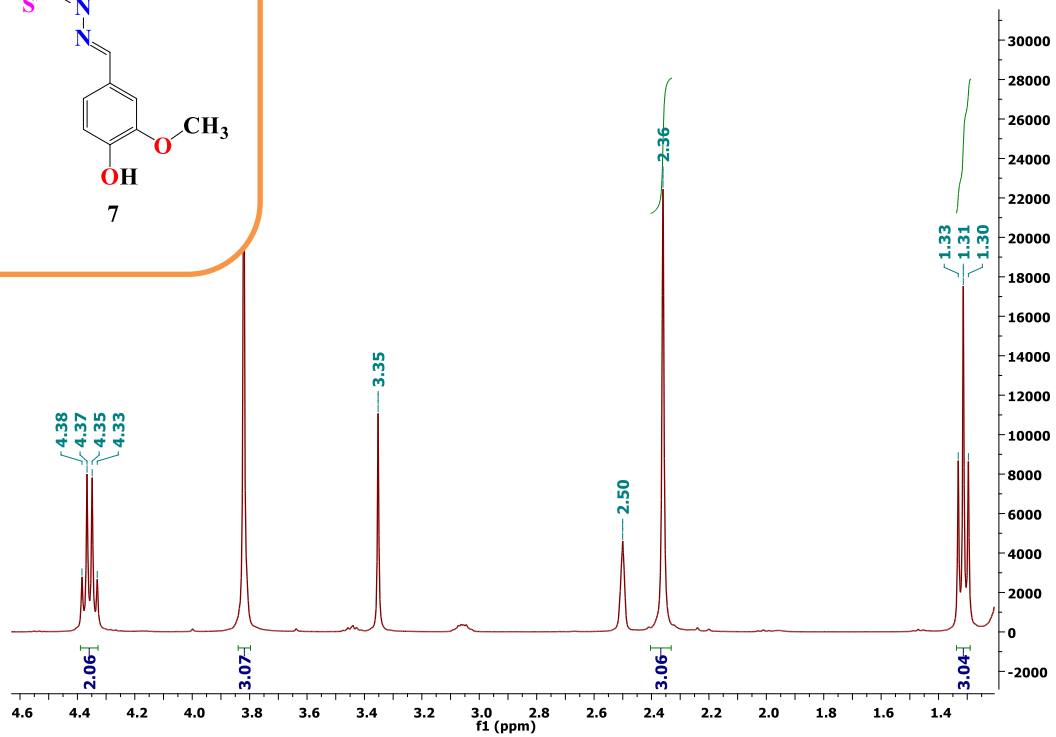

**Figure S20:** Magnification of  $^1\text{H}$ NMR spectrum of comp. 7.

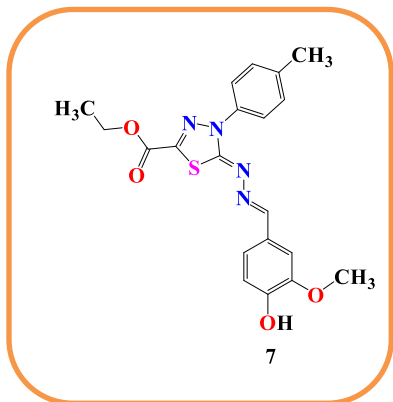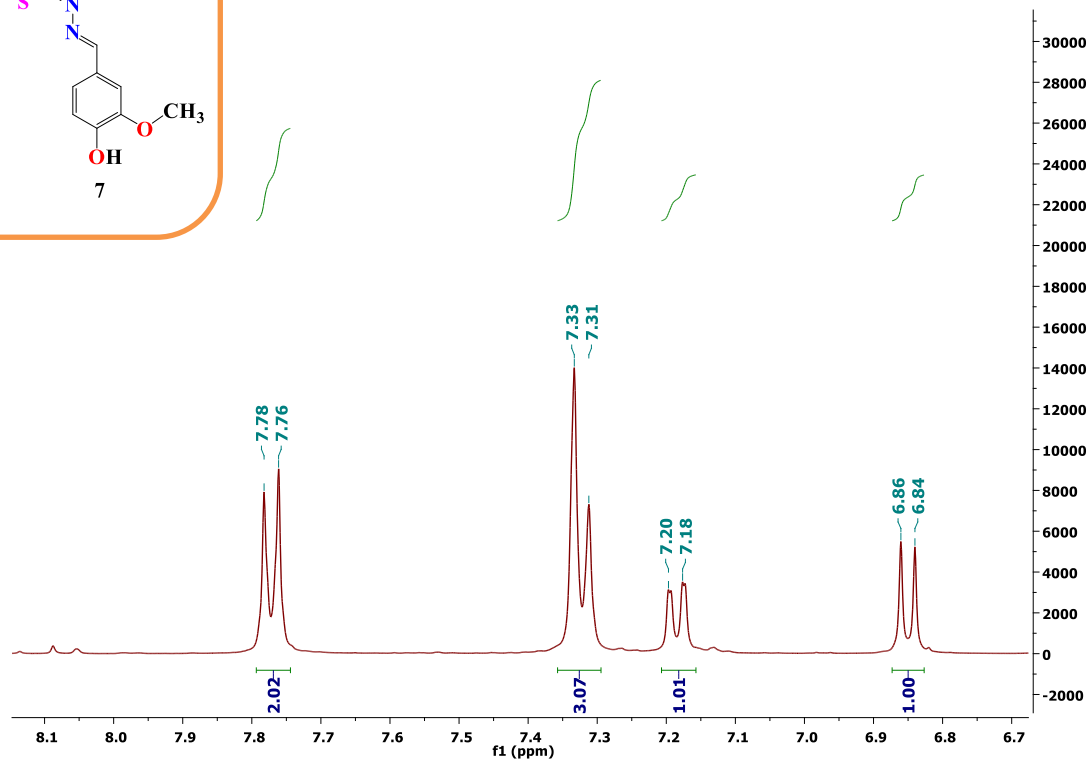

**Figure S21:** Magnification of  $^1\text{H}$ NMR spectrum of comp. 7.

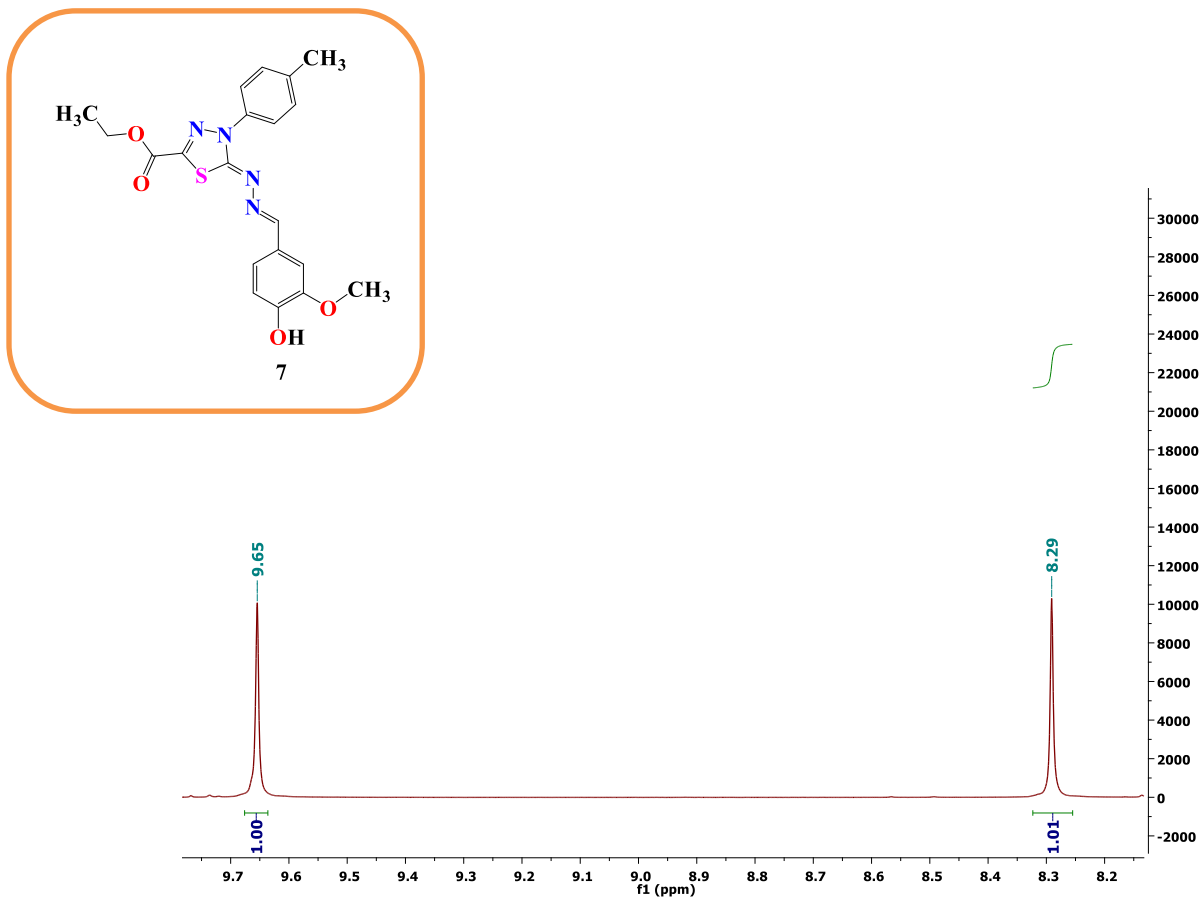

**Figure S22:** Magnification of <sup>1</sup>H NMR spectrum of comp. 7.

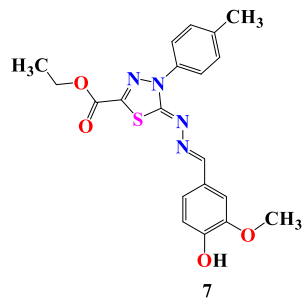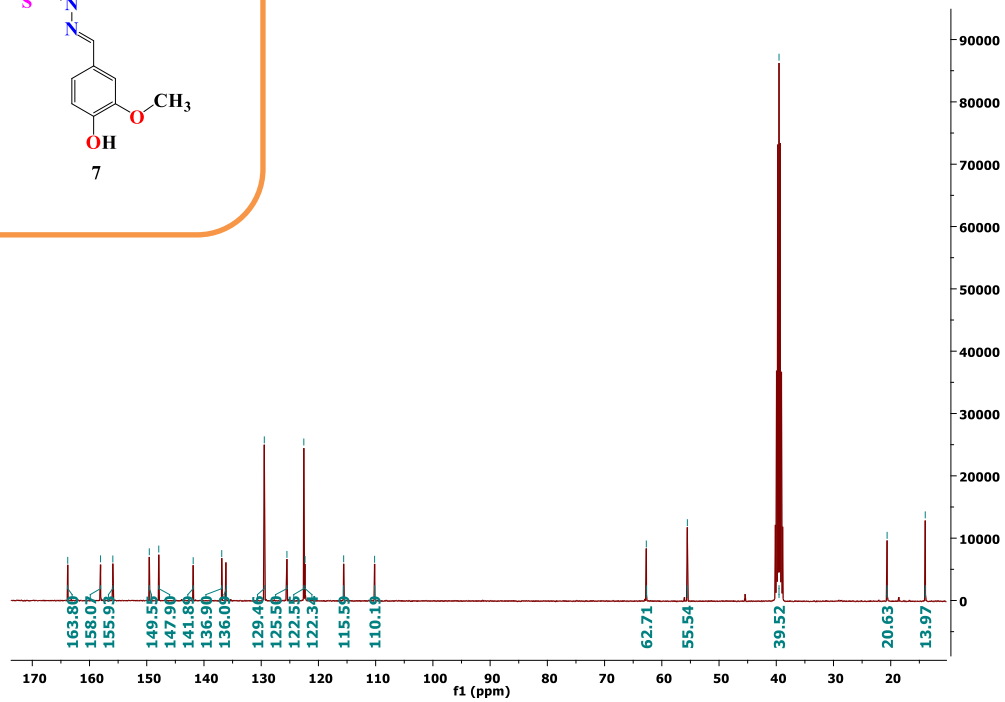

Figure S23:  $^{13}\text{C}$ NMR spectrum of comp. 7.

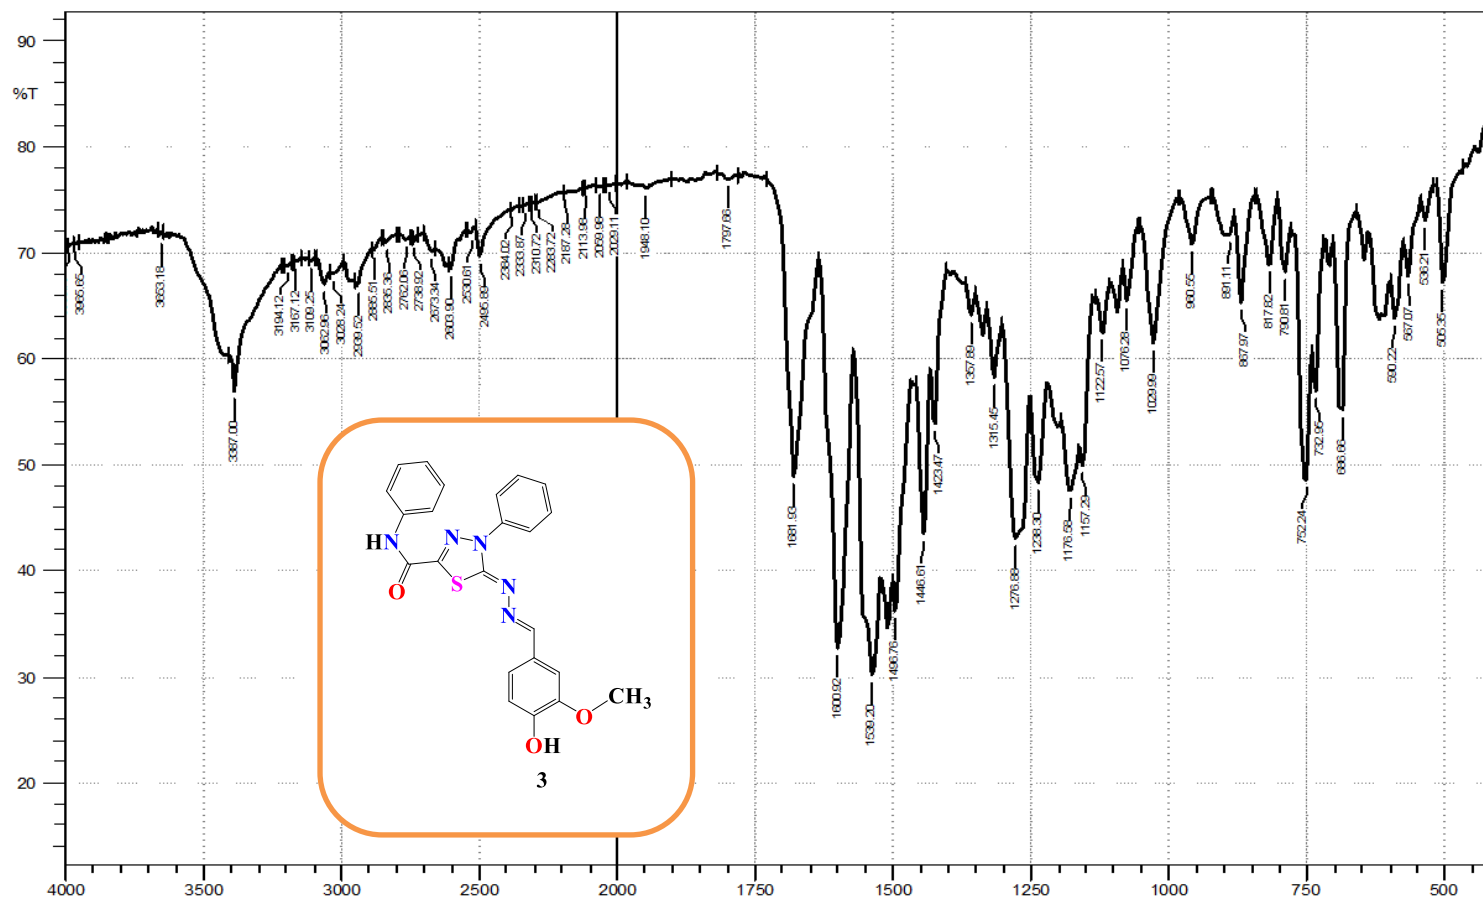

Figure S24: IR of comp. 3.



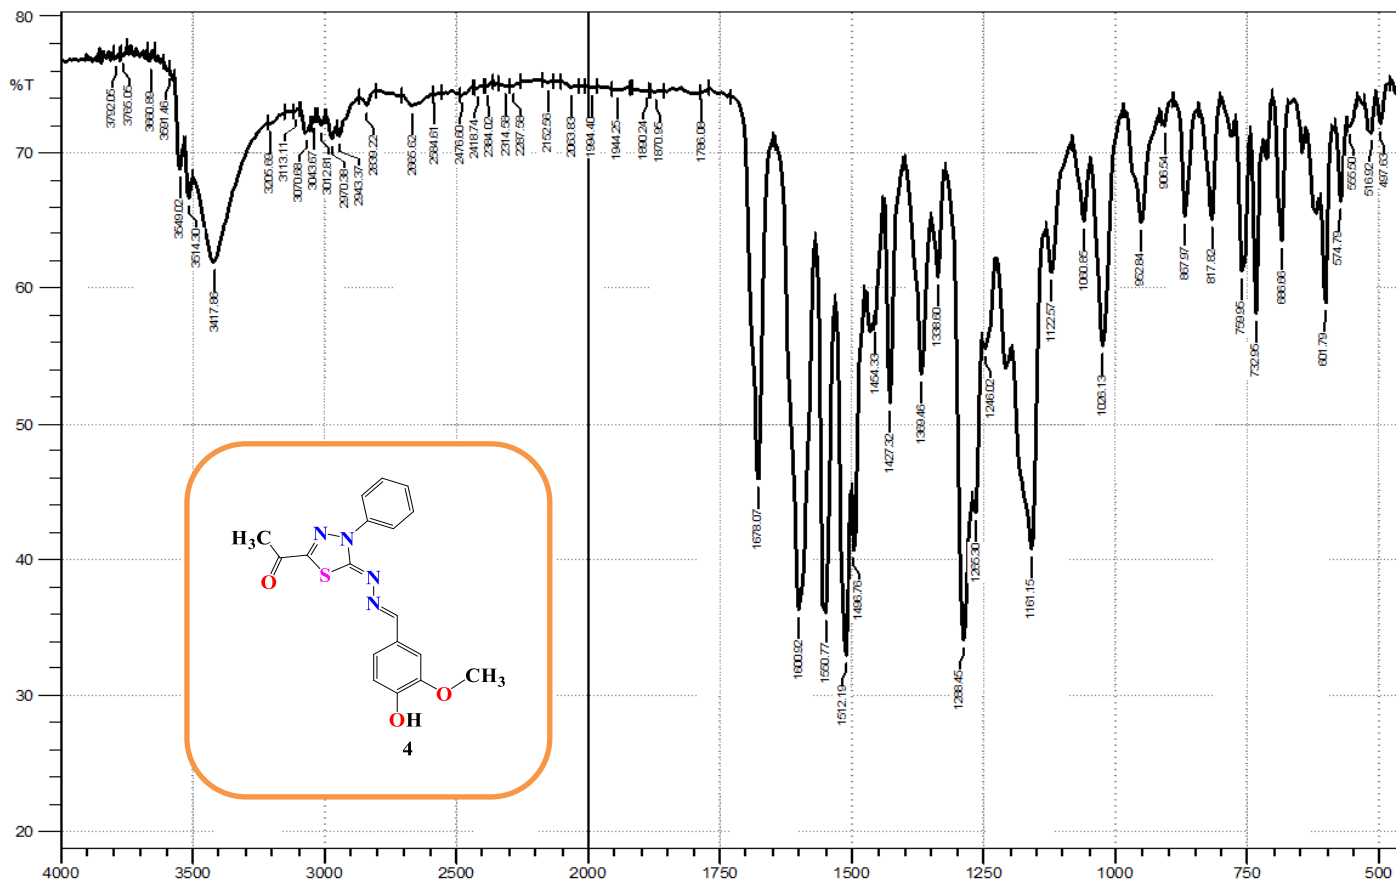

Figure S25: IR of comp. 4.

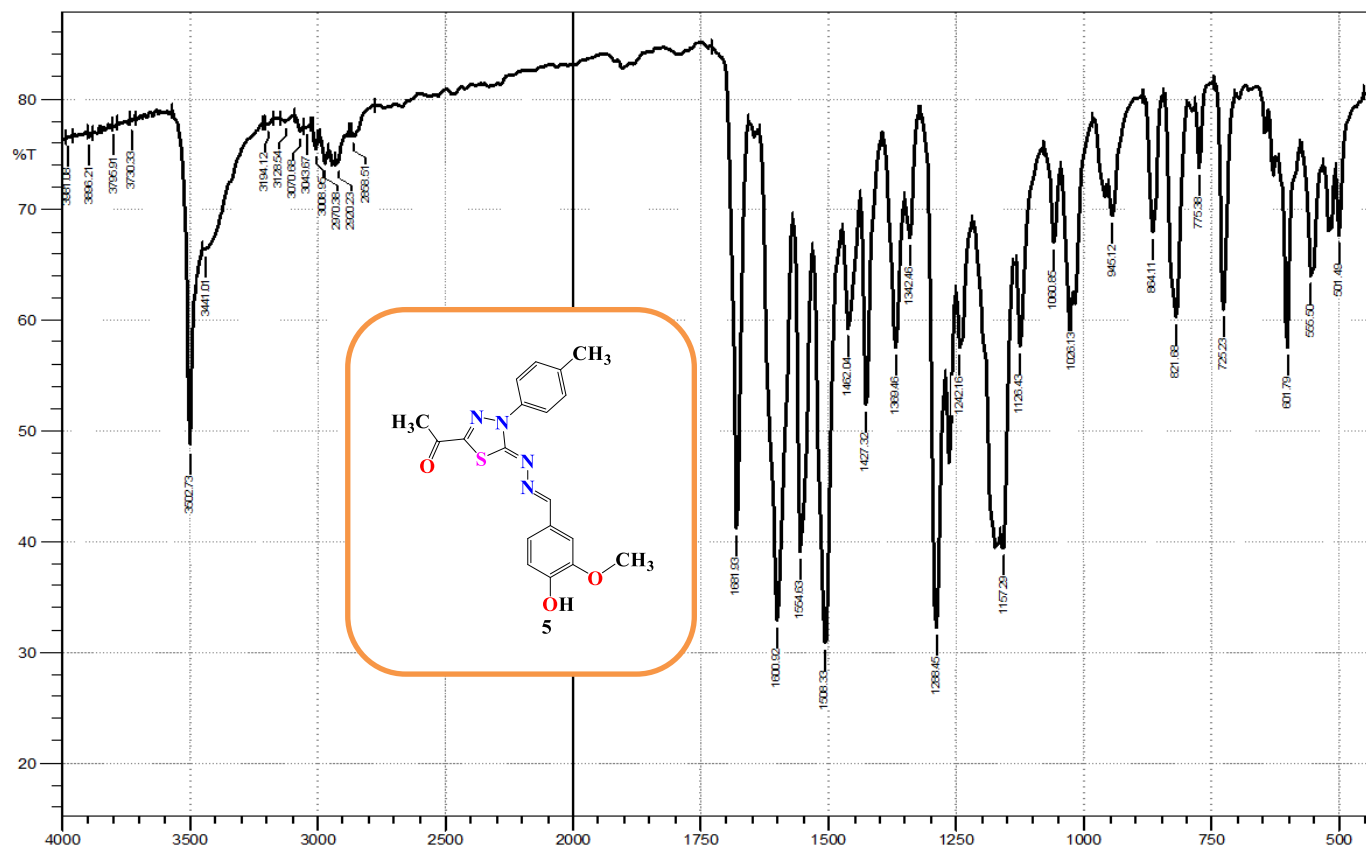

Figure S26: IR spectrum of comp. 5.

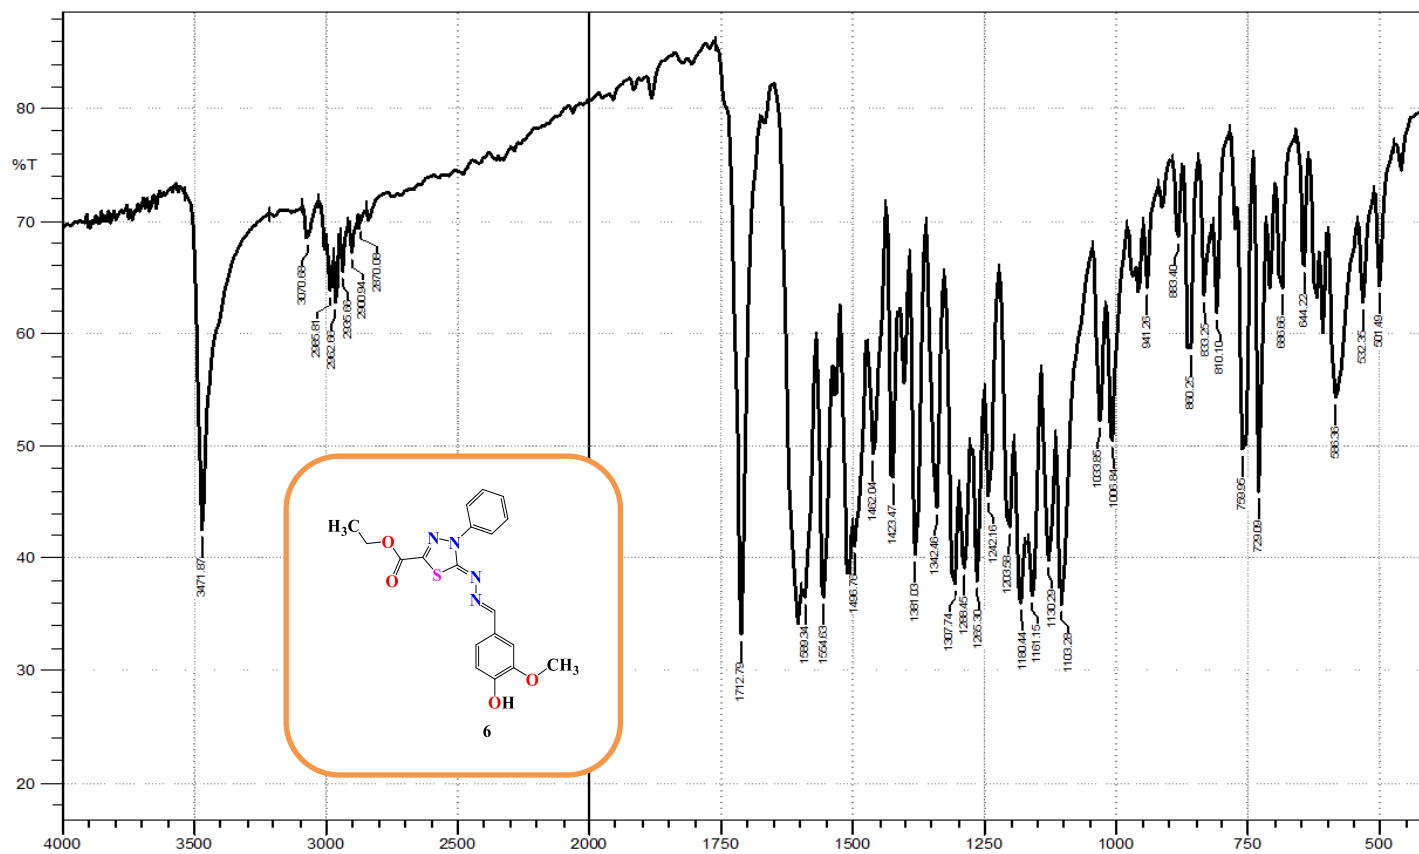

Figure S27: IR of comp. 6.

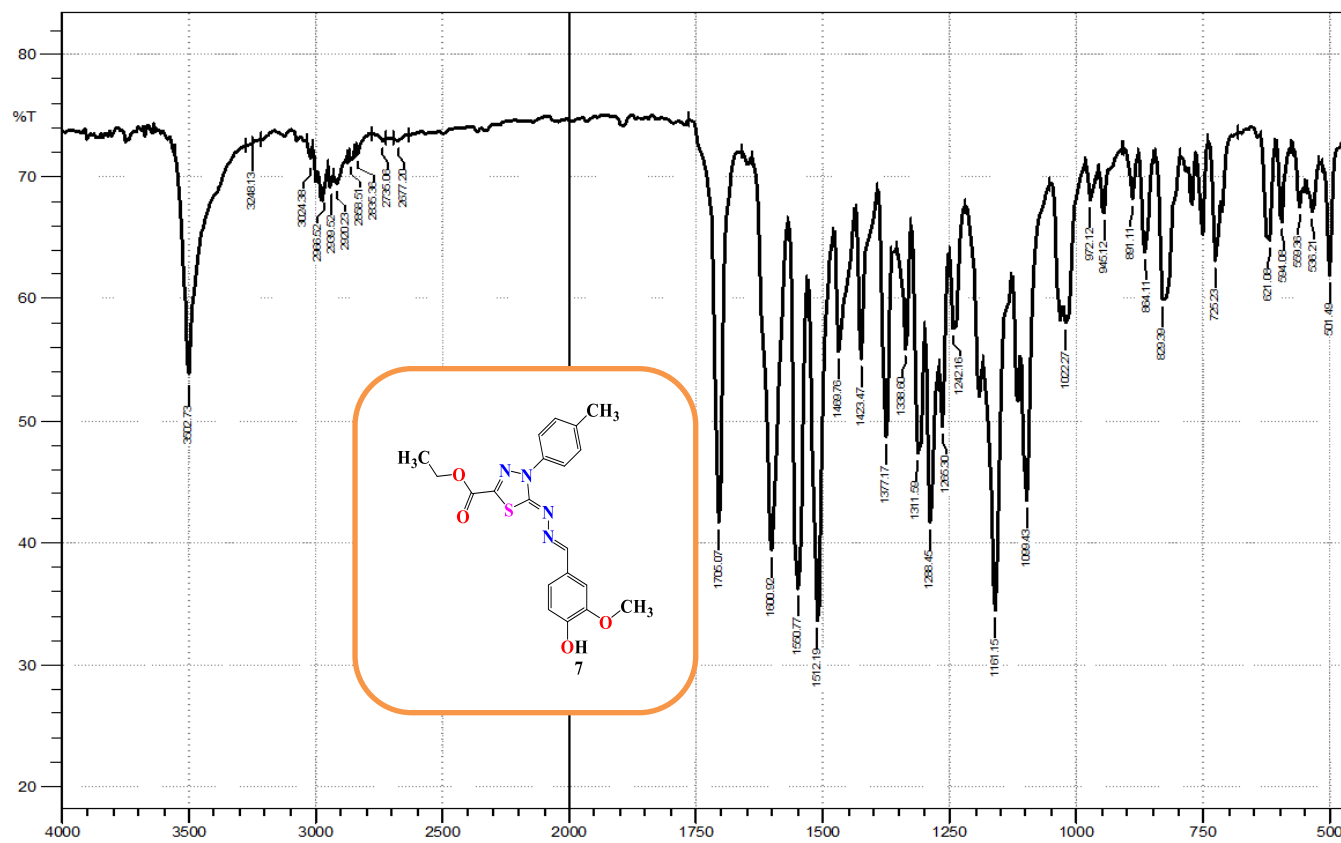

Figure S28: IR of comp. 7.

Spectrum RT 0.63 - 0.76 (10 scans)  
H\_13\_Scan2.js2 2020.09.09 17:32:55 ;  
ESI - Max: 9.7E6

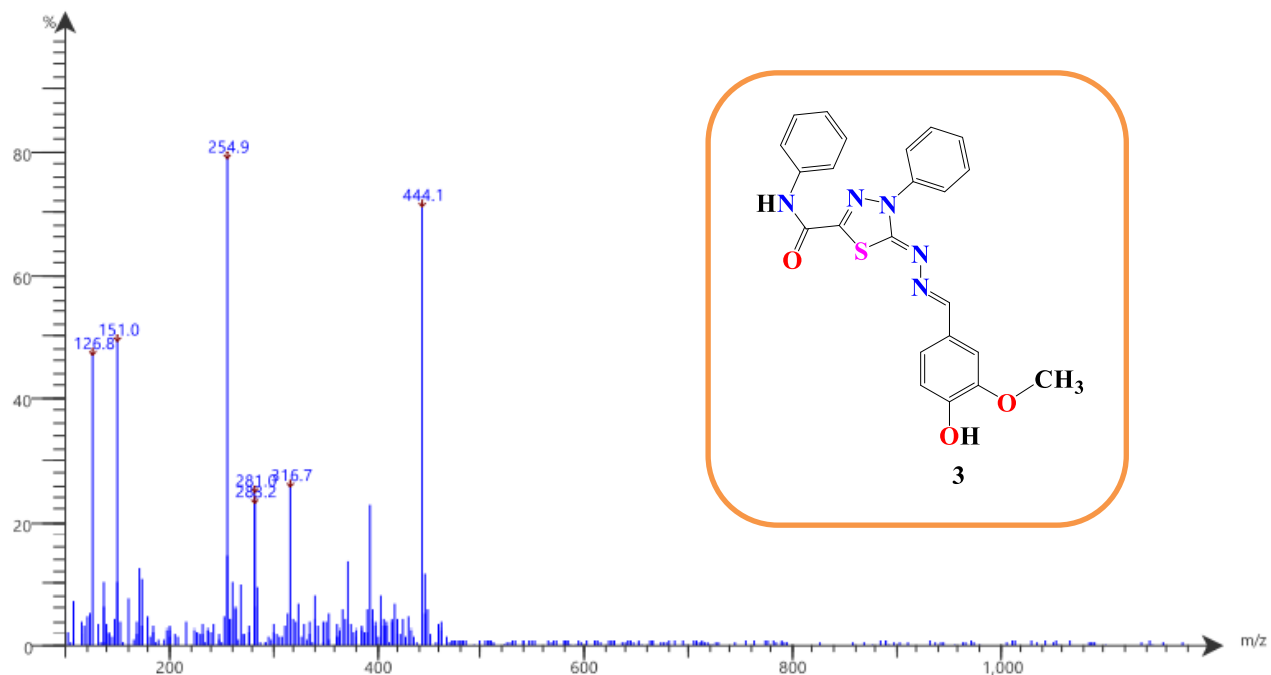

Figure S29: Mass Spectrum of comp. 3.
